# Supplementary material
Source: MDPI journal article supplement (https://www.mdpi.com/2304-6740/10/8/111)
Supplement: s1 [file s1]

## Supporting Information

# Stabilizing the (003) facet of single-crystal $\text{LiNi}_{0.6}\text{Co}_{0.2}\text{Mn}_{0.2}\text{O}_2$ cathode material using tungsten oxide as an exemplar

Yang Li <sup>1,2,†</sup>, Liubin Ben <sup>1,3,4,†</sup>, Hailong Yu <sup>1,3,4</sup>, Wenwu Zhao <sup>1,3,4</sup>, Xinjiang Liu <sup>5,\*</sup> and Xuejie Huang <sup>1,2,3,4,\*</sup>

1 Songshan Lake Materials Laboratory, Dongguan 520838, China; liyang\_lnu@163.com

2 Department of Physics, Liaoning University, Shenyang 110036, China; xjhuang@iphy.ac.cn

3 Beijing National Laboratory for Condensed Matter Physics, Institute of Physics, Chinese Academy of Sciences, Beijing 100190, China; benliubin@iphy.ac.cn

4 Center of Materials Science and Optoelectronics Engineering, University of Chinese Academy of Sciences, Beijing 100049, China

5 National Key Laboratory of Science and Technology on Power Sources, Tianjin Institute of Power Sources, Tianjin 300384, China; xjliu@nklps.org

§ These authors contributed equally to this work

† Correspondence: xjhuang@iphy.ac.cn; xinjiangliu@;

Table S1. Lattice constants and atom positions for the bare and WO<sub>3</sub>-coated NCM cathode materials from the Rietveld refinement of the XRD patterns. The space group used for the refinement was R-3m.

| <b>Bare NCM</b>                                                                        |                   |   |   |           |                |
|----------------------------------------------------------------------------------------|-------------------|---|---|-----------|----------------|
| $a = 2.8666(3) \text{ \AA}, c = 14.2066(1) \text{ \AA}, V = 101.107(2) \text{ \AA}^3,$ |                   |   |   |           |                |
| $R_{wp} = 4.63\%, R_p = 3.57\%, \text{gof} = 1.48$                                     |                   |   |   |           |                |
| Atoms                                                                                  | Wyckoff positions | x | y | z         | Site occupancy |
| Li                                                                                     | 3b                | 0 | 0 | 1/2       | 1              |
| Ni                                                                                     | 3a                | 0 | 0 | 0         | 0.6            |
| Co                                                                                     | 3a                | 0 | 0 | 0         | 0.2            |
| Mn                                                                                     | 3a                | 0 | 0 | 0         | 0.2            |
| O                                                                                      | 6c                | 0 | 0 | 0.2592(2) | 1              |
| <b>WO<sub>3</sub>-coated NCM</b>                                                       |                   |   |   |           |                |
| $a = 2.8701(1) \text{ \AA}, c = 14.2133(2) \text{ \AA}, V = 101.396(2) \text{ \AA}^3$  |                   |   |   |           |                |
| $R_{wp} = 4.84\%, R_p = 3.70\%, \text{gof} = 1.54$                                     |                   |   |   |           |                |
| Atoms                                                                                  | Wyckoff positions | x | y | z         | Site occupancy |
| Li                                                                                     | 3b                | 0 | 0 | 1/2       | 1              |
| Ni                                                                                     | 3a                | 0 | 0 | 0         | 0.6            |
| Co                                                                                     | 3a                | 0 | 0 | 0         | 0.2            |
| Mn                                                                                     | 3a                | 0 | 0 | 0         | 0.2            |
| O                                                                                      | 6c                | 0 | 0 | 0.2599(4) | 1              |

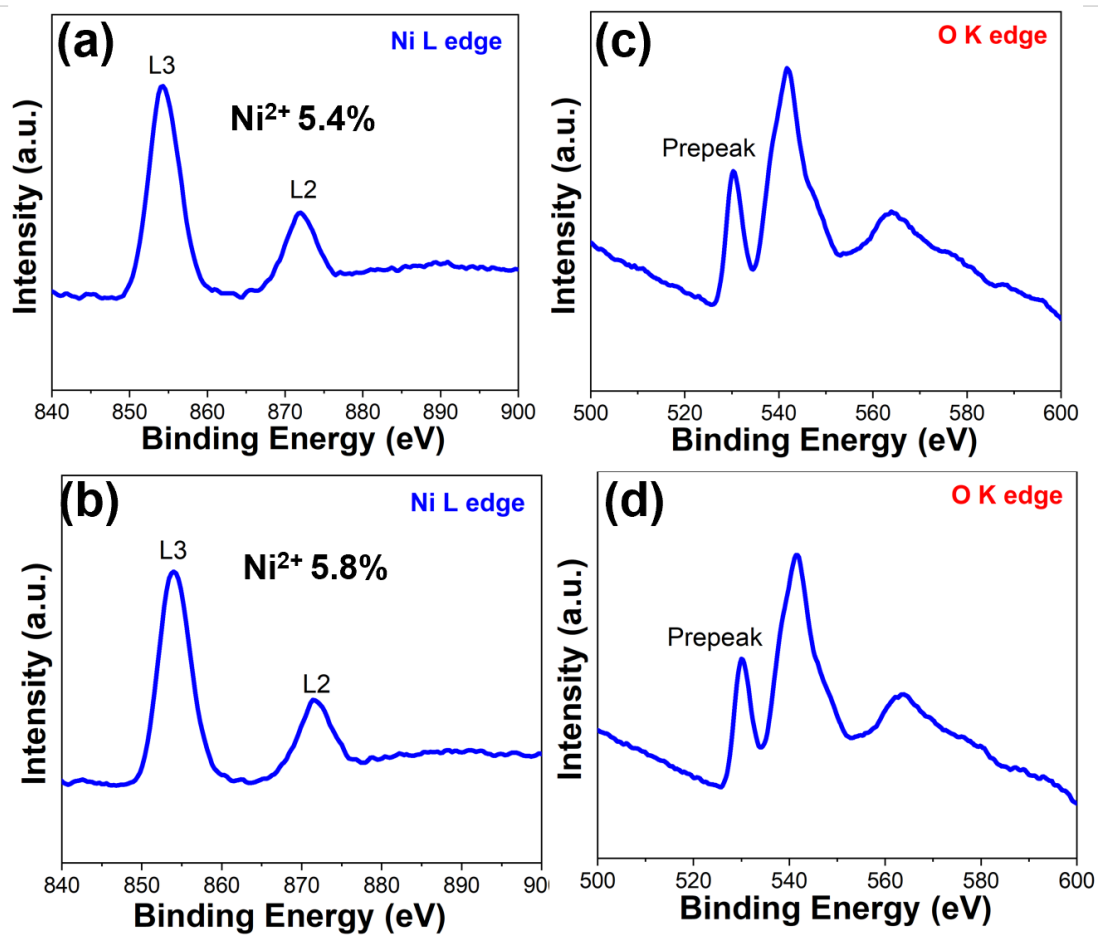

Figure S1. EELS Ni L edge and O K edge spectra for uncycled bare NCM from (a, c) ROI-A and (b, d) ROI-B.

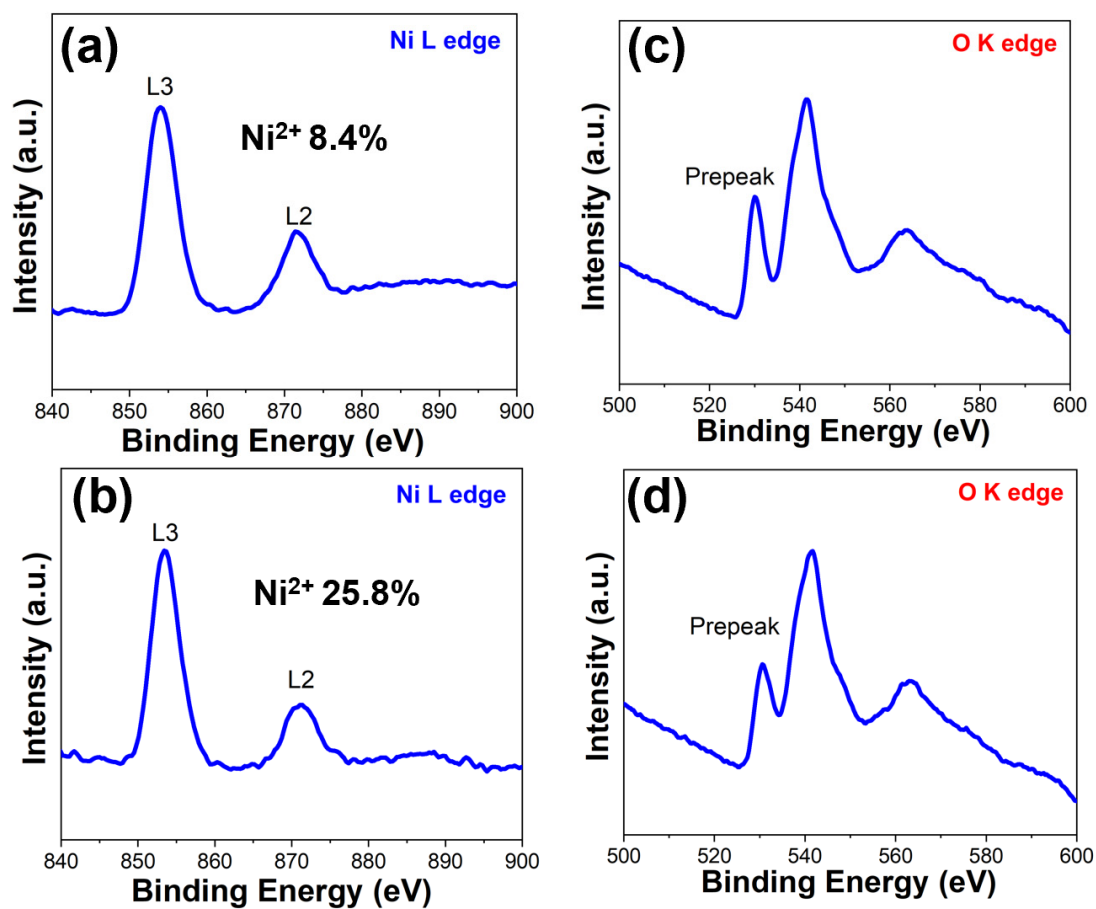

Figure S2. EELS Ni L edge and O K edge spectra for uncycled WO<sub>3</sub>-coated NCM from (a, c) ROI-C and (b, d) ROI-D.

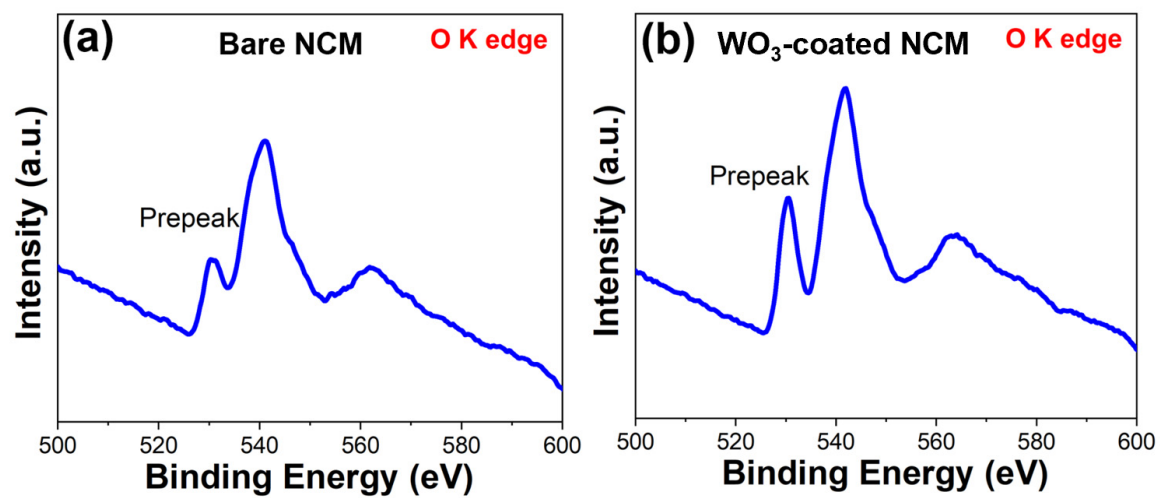

Figure S3. EELS oxygen K edge spectra from bulk region of cycled (a) bare and (b) WO<sub>3</sub>-coated NCM.

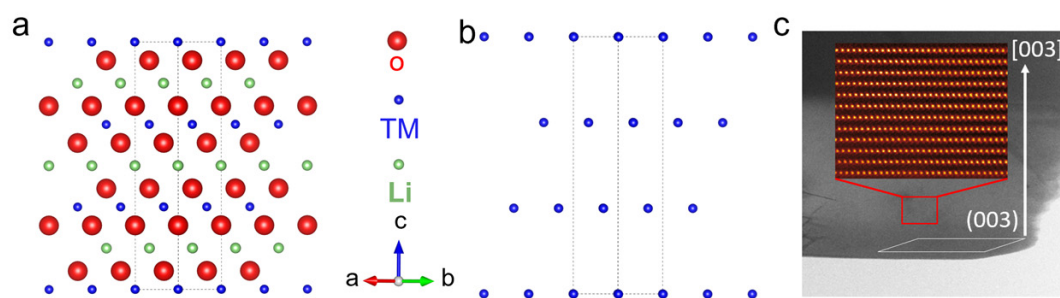

#### d FIB preparation of STEM samples with precisely selected facet of interest

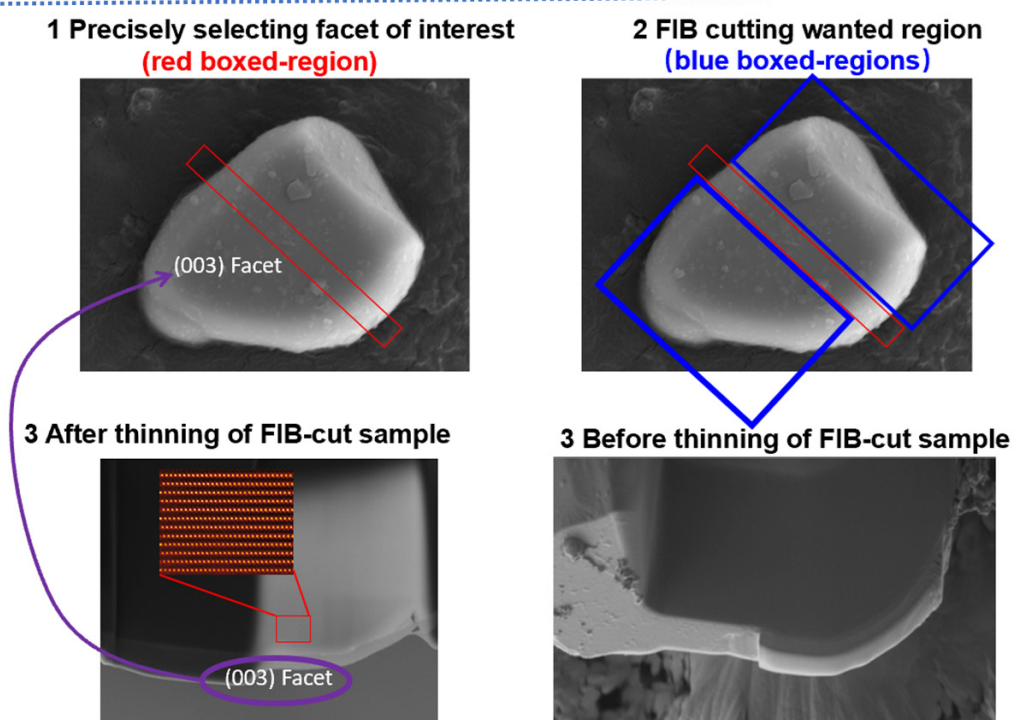

Figure S4. (a) Crystal structure and (b) arrangement of TM ions of NCM layered cathode material viewed along the [010] zone axis. (c) A STEM HAADF image showing arrangement of TM atoms with respect to the FIB-cut single crystal. (d) FIB preparation of STEM samples with precisely selected facet of interest. Based on the arrangement of TM atoms, the crystallographic [003] direction and (003) plane are indexed.

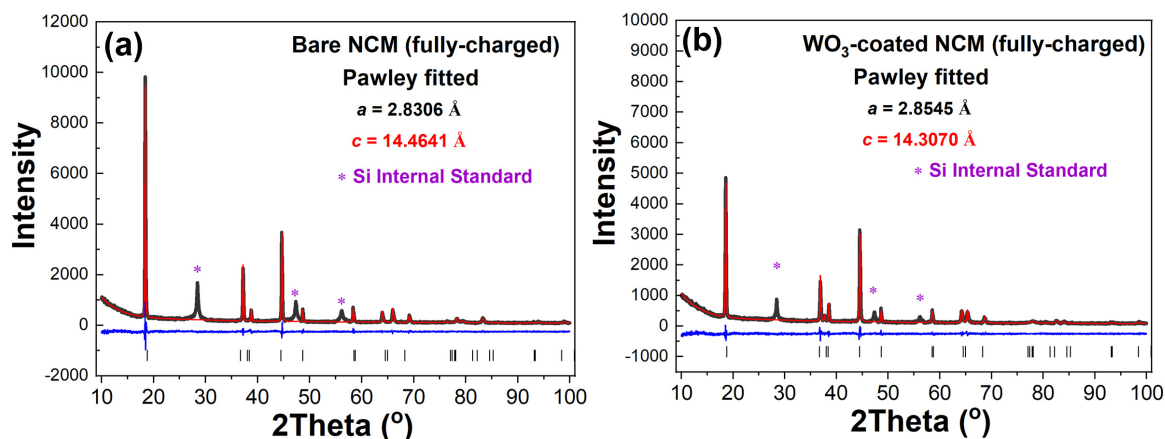

Figure S5. Pawley fitting of XRD patterns for 1<sup>st</sup> cycle fully-charged (a) bare and (b) WO<sub>3</sub>-coated NCM cathode powders scraped from electrodes. Silicon internal standard is marked with \*. The Pawley fitting started with fitting XRD patterns related to silicon internal standard ( $a = 5.4313 \text{ Å}$ ) to obtain a specimen displacement value; then, the value was fixed for fitting of XRD patterns related to cycled bare NCM and WO<sub>3</sub>-coated NCM samples.
